# Supplementary material for: The Short-Term Variation of Human Gut Mycobiome in Response to Dietary Intervention of Different Macronutrient Distributions
Source: MDPI journal article supplement (doi:10.3390/nu15092152), 2023-04-29
Supplement: s1 [file s1]

# CENT 2015 checklist\*; CONSORT 2010 checklist items with modifications or additions for individual or series of N-of-1 trials

| Section/Topic             | Item No | Checklist item                                                                                                                                                                                                                                                  | Reported on page No |
|---------------------------|---------|-----------------------------------------------------------------------------------------------------------------------------------------------------------------------------------------------------------------------------------------------------------------|---------------------|
| <b>Title and abstract</b> |         |                                                                                                                                                                                                                                                                 |                     |
|                           | 1a      | Identify as an “N-of-1 trial” in the title<br><i>For series:</i> Identify as “a series of N-of-1 trials” in the title                                                                                                                                           | 1                   |
|                           | 1b      | Structured summary of trial design, methods, results, and conclusions (for specific guidance see CONSORT for abstracts)                                                                                                                                         | 1                   |
| <b>Introduction</b>       |         |                                                                                                                                                                                                                                                                 |                     |
| Background and objectives | 2a.1    | Scientific background and explanation of rationale                                                                                                                                                                                                              | 1, 2                |
|                           | 2a.2    | Rationale for using N-of-1 approach                                                                                                                                                                                                                             | 1, 2                |
|                           | 2b      | Specific objectives or hypotheses                                                                                                                                                                                                                               | 2                   |
| <b>Methods</b>            |         |                                                                                                                                                                                                                                                                 |                     |
| Trial design              | 3a      | Describe trial design, planned number of periods, and duration of each period (including run-in and wash out, if applicable)<br><i>In addition for series:</i> Whether and how the design was individualized to each participant, and explain the series design | 2                   |
|                           | 3b      | Important changes to methods after trial commencement (such as eligibility criteria), with reasons                                                                                                                                                              | 2                   |
| Participants              | 4a      | Diagnosis or disorder, diagnostic criteria, comorbid conditions, and concurrent therapies.<br><i>For series:</i> Same as CONSORT item 4a                                                                                                                        | 2                   |
|                           | 4b      | Settings and locations where the data were collected                                                                                                                                                                                                            | 2                   |
|                           | 4c      | Whether the trial(s) represents a research study and if so, whether institutional ethics approval was obtained                                                                                                                                                  | 12                  |
| Interventions             | 5       | The interventions for each period with sufficient details to allow replication, including how and when they were actually administered                                                                                                                          | 2                   |
| Outcomes                  | 6a.1    | Completely defined pre-specified primary and secondary outcome measures, including how and when they were assessed                                                                                                                                              | 2–4                 |
|                           | 6a.2    | Description and measurement properties (validity and reliability) of outcome assessment tools                                                                                                                                                                   | 2–4                 |
|                           | 6b      | Any changes to trial outcomes after the trial commenced, with reasons                                                                                                                                                                                           | Not applicable      |
| Sample size               | 7a      | How sample size was determined                                                                                                                                                                                                                                  | 2, Reference 12     |
|                           | 7b      | When applicable, explanation of any interim analyses and stopping guidelines                                                                                                                                                                                    | Not applicable      |
| Randomisation:            |         |                                                                                                                                                                                                                                                                 |                     |
| Sequence generation       | 8a      | Whether the order of treatment periods was randomised, with rationale, and method used to generate allocation sequence                                                                                                                                          | 2, Reference 12     |
|                           | 8b      | When applicable, type of randomisation; details of any restrictions (such as pairs, blocking)                                                                                                                                                                   | 2, Reference 12     |

|                                  |     |                                                                                                                                                                                                                                                                                                         |                 |
|----------------------------------|-----|---------------------------------------------------------------------------------------------------------------------------------------------------------------------------------------------------------------------------------------------------------------------------------------------------------|-----------------|
|                                  | 8c  | Full, intended sequence of periods                                                                                                                                                                                                                                                                      | 2, Reference 12 |
| Allocation concealment mechanism | 9   | Mechanism used to implement the random allocation sequence (such as sequentially numbered containers), describing any steps taken to conceal the sequence until interventions were assigned                                                                                                             | 2, Reference 12 |
| Implementation                   | 10  | Who generated the random allocation sequence, who enrolled participants, and who assigned participants to interventions                                                                                                                                                                                 | 2, Reference 12 |
| Blinding                         | 11a | If done, who was blinded after assignment to interventions (for example, participants, care providers, those assessing outcomes) and how                                                                                                                                                                | 2, Reference 12 |
|                                  | 11b | If relevant, description of the similarity of interventions                                                                                                                                                                                                                                             | Not relevant    |
| Statistical methods              | 12a | Methods used to summarize data and compare interventions for primary and secondary outcomes                                                                                                                                                                                                             | 4               |
|                                  | 12b | <b>For series:</b> If done, methods of quantitative synthesis of individual trial data, including subgroup analyses, adjusted analyses, and how heterogeneity between participants was assessed, (for specific guidance on reporting syntheses of multiple trials, please consult the PRISMA Statement) | 4               |
|                                  | 12c | Statistical methods used to account for carryover effect, period effects, and intra-subject correlation                                                                                                                                                                                                 | Not applicable  |

## Results

|                                                      |       |                                                                                                                                                                                                                                                                                 |                     |
|------------------------------------------------------|-------|---------------------------------------------------------------------------------------------------------------------------------------------------------------------------------------------------------------------------------------------------------------------------------|---------------------|
| Participant flow (a diagram is strongly recommended) | 13a.1 | Number and sequence of periods completed, and any changes from original plan with reasons                                                                                                                                                                                       | 4                   |
|                                                      | 13a.2 | <b>For series:</b> The number of participants who were enrolled, assigned to interventions, and analysed for the primary outcome                                                                                                                                                | 4                   |
|                                                      | 13b   | <b>For series:</b> losses or exclusions of participants after treatment assignment, with reasons, and period in which this occurred, if applicable                                                                                                                              | 2, Reference 12     |
| Recruitment                                          | 14a   | Dates defining the periods of recruitment and follow-up                                                                                                                                                                                                                         | 2, Reference 12     |
|                                                      | 14b   | Whether any periods were stopped early and/or whether trial was stopped early, with reason(s).                                                                                                                                                                                  | Not applicable      |
| Baseline data                                        | 15    | A table showing baseline demographic and clinical characteristics for each group                                                                                                                                                                                                | 4                   |
| Numbers analysed                                     | 16    | For each intervention, number of periods analysed.<br><b>In addition for series:</b> if quantitative synthesis was performed, number of trials for which data were synthesized                                                                                                  | 3                   |
| Outcomes and estimation                              | 17a.1 | For each primary and secondary outcome, results for each period; an accompanying figure displaying the trial data is recommended.                                                                                                                                               | 5-9                 |
|                                                      | 17a.2 | For each primary and secondary outcome, the estimated effect size and its precision (such as 95% confidence interval)<br><b>In addition for series:</b> if quantitative synthesis was performed, group estimates of effect and precision for each primary and secondary outcome | 5-9                 |
|                                                      | 17b   | For binary outcomes, presentation of both absolute and relative effect sizes is recommended                                                                                                                                                                                     | Not binary outcomes |
| Ancillary analyses                                   | 18    | Results of any other analyses performed, including assessment of carryover effects, period effects, intra-subject correlation<br><b>In addition for series:</b> If done, results of subgroup or sensitivity analyses                                                            | 2, Reference 12     |

|                          |    |                                                                                                                  |                 |
|--------------------------|----|------------------------------------------------------------------------------------------------------------------|-----------------|
| Harms                    | 19 | All harms or unintended effects for each intervention. ( <i>for specific guidance see CONSORT for harms</i> )    | Not applicable  |
| <b>Discussion</b>        |    |                                                                                                                  |                 |
| Limitations              | 20 | Trial limitations, addressing sources of potential bias, imprecision, and, if relevant, multiplicity of analyses | 11              |
| Generalisability         | 21 | Generalisability (external validity, applicability) of the trial findings                                        | 10, 11          |
| Interpretation           | 22 | Interpretation consistent with results, balancing benefits and harms, and considering other relevant evidence    | 10, 11          |
| <b>Other information</b> |    |                                                                                                                  |                 |
| Registration             | 23 | Registration number and name of trial registry                                                                   | 11              |
| Protocol                 | 24 | Where the full trial protocol can be accessed, if available                                                      | 2, Reference 12 |
| Funding                  | 25 | Sources of funding and other support (such as supply of drugs), role of funders                                  | 11              |

\*We strongly recommend reading this statement in conjunction with the CONSORT 2010 Explanation and Elaboration for important clarifications on all the items. If relevant, we also recommend reading CONSORT extensions for cluster randomised trials, non-inferiority and equivalence trials, non-pharmacological treatments, herbal interventions, and pragmatic trials. Additional extensions are forthcoming: for those and for up to date references relevant to this checklist, see [www.consort-statement.org](http://www.consort-statement.org).
