# Supplementary material for: The Short-Term Variation of Human Gut Mycobiome in Response to Dietary Intervention of Different Macronutrient Distributions
Source: Nutrients. 2023 Apr 29;15(9):2152. doi: 10.3390/nu15092152 (PMC10180985; doi:10.3390/nu15092152)
Supplement: Supplementary file 1 [file nutrients-15-02152-s001.zip › Tian et al_Supplementary table_Nutrients.xlsx]

## Sheet: Tables Legends
Supplementary data
Table of contents
Table S1. Taxonomic annotation results for gut mycobiome in the WE-MACNUTR study.
Table S2. Fungal phylum with different relative abundance between trial arms.
Table S3. Fungal genera with different relative abundance between trial arms.
Table S4. Prevalence of core gut mycobiome detected at all sampling points.
Table S5. PERMANOVA analysis results based on Bray-Curtis dissimilarity.
Table S6. Short-term variation of the human gut mycobiome induced by the HC diet.
Table S7. Short-term variation of the human gut mycobiome induced by the LC diet.
Table S8. Associations between the mean relative fungal abundance and the mean values of glycemic responses in the HC diet (N = 28).
Table S9. Associations between the mean relative fungal abundance and the mean values of glycemic responses in the LC diet (N = 28).

## Sheet: Table S1
Table S1. Taxonomic annotation results for gut mycobiome in WE-MACNUTR study.
Label	Prevalence	Kindom	Phylum	Class	Order	Family	Genus
g1	0.895899	k_Fungi	_	_	_	_	_
g2	0.0126183	k_Fungi	p_Ascomycota	_	_	_	_
g3	0.00630915	k_Fungi	p_Ascomycota	c_Dothideomycetes	_	_	_
g4	0.00946372	k_Fungi	p_Ascomycota	c_Dothideomycetes	o_Botryosphaeriales	f_Botryosphaeriaceae	_
g5	0.113565	k_Fungi	p_Ascomycota	c_Dothideomycetes	o_Capnodiales	f_Cladosporiaceae	_
g6	0.312303	k_Fungi	p_Ascomycota	c_Dothideomycetes	o_Capnodiales	f_Cladosporiaceae	g_Cladosporium
g7	0.00630915	k_Fungi	p_Ascomycota	c_Dothideomycetes	o_Capnodiales	f_Mycosphaerellaceae	_
g8	0.00630915	k_Fungi	p_Ascomycota	c_Dothideomycetes	o_Capnodiales	f_Teratosphaeriaceae	_
g9	0.0283912	k_Fungi	p_Ascomycota	c_Dothideomycetes	o_Dothideales	f_Aureobasidiaceae	_
g10	0.022082	k_Fungi	p_Ascomycota	c_Dothideomycetes	o_Dothideales	f_Aureobasidiaceae	g_Aureobasidium
g11	0.0788644	k_Fungi	p_Ascomycota	c_Dothideomycetes	o_Pleosporales	_	_
g12	0.116719	k_Fungi	p_Ascomycota	c_Dothideomycetes	o_Pleosporales	f_Didymosphaeriaceae	g_Paraphaeosphaeria
g13	0.157729	k_Fungi	p_Ascomycota	c_Dothideomycetes	o_Pleosporales	f_Pleosporaceae	g_Alternaria
g14	0.0283912	k_Fungi	p_Ascomycota	c_Dothideomycetes	o_Pleosporales	f_Pleosporaceae	g_Bipolaris
g15	0.0283912	k_Fungi	p_Ascomycota	c_Dothideomycetes	o_Pleosporales	f_Pleosporaceae	g_Curvularia
g16	0.0157729	k_Fungi	p_Ascomycota	c_Dothideomycetes	o_Pleosporales	f_Sporormiaceae	_
g17	0.00946372	k_Fungi	p_Ascomycota	c_Dothideomycetes	o_Pleosporales	f_Thyridariaceae	g_Roussoella
g18	0.135647	k_Fungi	p_Ascomycota	c_Eurotiomycetes	o_Chaetothyriales	_	_
g19	0.0126183	k_Fungi	p_Ascomycota	c_Eurotiomycetes	o_Chaetothyriales	f_Herpotrichiellaceae	_
g20	0.0757098	k_Fungi	p_Ascomycota	c_Eurotiomycetes	o_Chaetothyriales	f_Herpotrichiellaceae	g_Cladophialophora
g21	0.0126183	k_Fungi	p_Ascomycota	c_Eurotiomycetes	o_Chaetothyriales	f_Herpotrichiellaceae	g_Exophiala
g22	0.0473186	k_Fungi	p_Ascomycota	c_Eurotiomycetes	o_Eurotiales	_	_
g23	0.0189274	k_Fungi	p_Ascomycota	c_Eurotiomycetes	o_Eurotiales	f_Aspergillaceae	_
g24	0.520505	k_Fungi	p_Ascomycota	c_Eurotiomycetes	o_Eurotiales	f_Aspergillaceae	g_Aspergillus
g25	0.00630915	k_Fungi	p_Ascomycota	c_Eurotiomycetes	o_Eurotiales	f_Aspergillaceae	g_Monascus
g26	0.343849	k_Fungi	p_Ascomycota	c_Eurotiomycetes	o_Eurotiales	f_Aspergillaceae	g_Penicillium
g27	0.0157729	k_Fungi	p_Ascomycota	c_Eurotiomycetes	o_Eurotiales	f_Trichocomaceae	g_Talaromyces
g28	0.00630915	k_Fungi	p_Ascomycota	c_Eurotiomycetes	o_Onygenales	f_Gymnoascaceae	_
g29	0.126183	k_Fungi	p_Ascomycota	c_Leotiomycetes	o_Erysiphales	f_Erysiphaceae	g_Blumeria
g30	0.00630915	k_Fungi	p_Ascomycota	c_Leotiomycetes	o_Erysiphales	f_Erysiphaceae	g_Podosphaera
g31	0.0252366	k_Fungi	p_Ascomycota	c_Leotiomycetes	o_Helotiales	f_Sclerotiniaceae	_
g32	0.00630915	k_Fungi	p_Ascomycota	c_Pezizomycetes	o_Pezizales	f_Pyronemataceae	_
g33	0.170347	k_Fungi	p_Ascomycota	c_Saccharomycetes	o_Saccharomycetales	_	_
g34	0.0599369	k_Fungi	p_Ascomycota	c_Saccharomycetes	o_Saccharomycetales	f_Debaryomycetaceae	g_Debaryomyces
g35	0.0157729	k_Fungi	p_Ascomycota	c_Saccharomycetes	o_Saccharomycetales	f_Debaryomycetaceae	g_Meyerozyma
g36	0.022082	k_Fungi	p_Ascomycota	c_Saccharomycetes	o_Saccharomycetales	f_Metschnikowiaceae	g_Clavispora
g37	0.00630915	k_Fungi	p_Ascomycota	c_Saccharomycetes	o_Saccharomycetales	f_Phaffomycetaceae	g_Cyberlindnera
g38	0.0157729	k_Fungi	p_Ascomycota	c_Saccharomycetes	o_Saccharomycetales	f_Phaffomycetaceae	g_Wickerhamomyces
g39	0.0410095	k_Fungi	p_Ascomycota	c_Saccharomycetes	o_Saccharomycetales	f_Pichiaceae	g_Pichia
g40	0.00630915	k_Fungi	p_Ascomycota	c_Saccharomycetes	o_Saccharomycetales	f_Saccharomycetaceae	g_Eremothecium
g41	0.138801	k_Fungi	p_Ascomycota	c_Saccharomycetes	o_Saccharomycetales	f_Saccharomycetaceae	g_Kazachstania
g42	0.00630915	k_Fungi	p_Ascomycota	c_Saccharomycetes	o_Saccharomycetales	f_Saccharomycetaceae	g_Lachancea
g43	0.567823	k_Fungi	p_Ascomycota	c_Saccharomycetes	o_Saccharomycetales	f_Saccharomycetaceae	g_Saccharomyces
g44	0.00630915	k_Fungi	p_Ascomycota	c_Saccharomycetes	o_Saccharomycetales	f_Saccharomycetales_fam_Incertae_sedis	_
g45	0.529968	k_Fungi	p_Ascomycota	c_Saccharomycetes	o_Saccharomycetales	f_Saccharomycetales_fam_Incertae_sedis	g_Candida
g46	0.00630915	k_Fungi	p_Ascomycota	c_Saccharomycetes	o_Saccharomycetales	f_Saccharomycetales_fam_Incertae_sedis	g_Starmerella
g47	0.0252366	k_Fungi	p_Ascomycota	c_Saccharomycetes	o_Saccharomycetales	f_Saccharomycodaceae	g_Hanseniaspora
g48	0.00630915	k_Fungi	p_Ascomycota	c_Saccharomycetes	o_Saccharomycetales	f_Trichomonascaceae	_
g49	0.0126183	k_Fungi	p_Ascomycota	c_Sordariomycetes	_	_	_
g50	0.0630915	k_Fungi	p_Ascomycota	c_Sordariomycetes	o_Hypocreales	_	_
g51	0.0189274	k_Fungi	p_Ascomycota	c_Sordariomycetes	o_Hypocreales	f_Hypocreaceae	g_Trichoderma
g52	0.0126183	k_Fungi	p_Ascomycota	c_Sordariomycetes	o_Hypocreales	f_Hypocreales_fam_Incertae_sedis	_
g53	0.0567823	k_Fungi	p_Ascomycota	c_Sordariomycetes	o_Hypocreales	f_Nectriaceae	_
g54	0.0157729	k_Fungi	p_Ascomycota	c_Sordariomycetes	o_Hypocreales	f_Nectriaceae	g_Fusarium
g55	0.0157729	k_Fungi	p_Ascomycota	c_Sordariomycetes	o_Microascales	f_Microascaceae	_
g56	0.0126183	k_Fungi	p_Ascomycota	c_Sordariomycetes	o_Microascales	f_Microascaceae	g_Scopulariopsis
g57	0.0189274	k_Fungi	p_Ascomycota	c_Sordariomycetes	o_Sordariales	f_Chaetomiaceae	_
g58	0.00630915	k_Fungi	p_Ascomycota	c_Sordariomycetes	o_Sordariales	f_Chaetomiaceae	g_Chaetomium
g59	0.00630915	k_Fungi	p_Ascomycota	c_Sordariomycetes	o_Sordariales	f_Lasiosphaeriaceae	g_Podospora
g60	0.0157729	k_Fungi	p_Ascomycota	c_Sordariomycetes	o_Trichosphaeriales	f_Trichosphaeriaceae	_
g61	0.00630915	k_Fungi	p_Ascomycota	c_Sordariomycetes	o_Trichosphaeriales	f_Trichosphaeriaceae	g_Nigrospora
g62	0.00630915	k_Fungi	p_Ascomycota	c_Sordariomycetes	o_Xylariales	f_Diatrypaceae	g_Eutypella
g63	0.00630915	k_Fungi	p_Basidiomycota	c_Agaricomycetes	o_Agaricales	f_Bolbitiaceae	g_Agrocybe
g64	0.0504732	k_Fungi	p_Basidiomycota	c_Agaricomycetes	o_Agaricales	f_Omphalotaceae	g_Lentinula
g65	0.0914826	k_Fungi	p_Basidiomycota	c_Agaricomycetes	o_Agaricales	f_Physalacriaceae	g_Flammulina
g66	0.132492	k_Fungi	p_Basidiomycota	c_Agaricomycetes	o_Agaricales	f_Pleurotaceae	g_Pleurotus
g67	0.0851735	k_Fungi	p_Basidiomycota	c_Agaricomycetes	o_Auriculariales	f_Auriculariaceae	g_Auricularia
g68	0.00630915	k_Fungi	p_Basidiomycota	c_Agaricomycetes	o_Cantharellales	f_Cantharellales_fam_Incertae_sedis	_
g69	0.0252366	k_Fungi	p_Basidiomycota	c_Agaricomycetes	o_Polyporales	f_Phanerochaetaceae	g_Phanerochaete
g70	0.00630915	k_Fungi	p_Basidiomycota	c_Agaricomycetes	o_Polyporales	f_Polyporaceae	g_Trametes
g71	0.299685	k_Fungi	p_Basidiomycota	c_Agaricomycetes	o_unidentified	f_unidentified	g_unidentified
g72	0.0126183	k_Fungi	p_Basidiomycota	c_Cystobasidiomycetes	_	_	_
g73	0.0536278	k_Fungi	p_Basidiomycota	c_Cystobasidiomycetes	o_Cystobasidiales	f_Cystobasidiaceae	g_Cystobasidium
g74	0.0126183	k_Fungi	p_Basidiomycota	c_Cystobasidiomycetes	o_Cystobasidiales	f_Cystobasidiaceae	g_Occultifur
g75	0.00630915	k_Fungi	p_Basidiomycota	c_Cystobasidiomycetes	o_Erythrobasidiales	f_Erythrobasidiales_fam_Incertae_sedis	g_Sakaguchia
g76	0.00630915	k_Fungi	p_Basidiomycota	c_Exobasidiomycetes	o_Microstromatales	f_Microstromatales_fam_Incertae_sedis	_
g77	0.00630915	k_Fungi	p_Basidiomycota	c_Exobasidiomycetes	o_Tilletiales	f_Tilletiaceae	g_Tilletia
g78	0.37224	k_Fungi	p_Basidiomycota	c_Malasseziomycetes	o_Malasseziales	f_Malasseziaceae	g_Malassezia
g79	0.00630915	k_Fungi	p_Basidiomycota	c_Microbotryomycetes	_	_	_
g80	0.107256	k_Fungi	p_Basidiomycota	c_Microbotryomycetes	o_Sporidiobolales	f_Sporidiobolaceae	g_Rhodotorula
g81	0.022082	k_Fungi	p_Basidiomycota	c_Microbotryomycetes	o_Sporidiobolales	f_Sporidiobolaceae	g_Sporobolomyces
g82	0.022082	k_Fungi	p_Basidiomycota	c_Tremellomycetes	o_Cystofilobasidiales	_	_
g83	0.00630915	k_Fungi	p_Basidiomycota	c_Tremellomycetes	o_Cystofilobasidiales	f_Cystofilobasidiaceae	g_Cystofilobasidium
g84	0.0189274	k_Fungi	p_Basidiomycota	c_Tremellomycetes	o_Cystofilobasidiales	f_Mrakiaceae	_
g85	0.044164	k_Fungi	p_Basidiomycota	c_Tremellomycetes	o_Filobasidiales	f_Filobasidiaceae	g_Filobasidium
g86	0.00630915	k_Fungi	p_Basidiomycota	c_Tremellomycetes	o_Filobasidiales	f_Filobasidiaceae	g_Naganishia
g87	0.0694006	k_Fungi	p_Basidiomycota	c_Tremellomycetes	o_Tremellales	_	_
g88	0.00630915	k_Fungi	p_Basidiomycota	c_Tremellomycetes	o_Tremellales	f_Bulleribasidiaceae	g_Dioszegia
g89	0.00630915	k_Fungi	p_Basidiomycota	c_Tremellomycetes	o_Tremellales	f_Bulleribasidiaceae	g_Hannaella
g90	0.00630915	k_Fungi	p_Basidiomycota	c_Tremellomycetes	o_Tremellales	f_Rhynchogastremataceae	g_Papiliotrema
g91	0.205047	k_Fungi	p_Basidiomycota	c_Tremellomycetes	o_Trichosporonales	f_Trichosporonaceae	_
g92	0.00630915	k_Fungi	p_Basidiomycota	c_Tremellomycetes	o_Trichosporonales	f_Trichosporonaceae	g_Apiotrichum
g93	0.589905	k_Fungi	p_Basidiomycota	c_Tremellomycetes	o_Trichosporonales	f_Trichosporonaceae	g_Cutaneotrichosporon
g94	0.0820189	k_Fungi	p_Basidiomycota	c_Tremellomycetes	o_Trichosporonales	f_Trichosporonaceae	g_Trichosporon
g95	0.138801	k_Fungi	p_Basidiomycota	c_Ustilaginomycetes	o_Ustilaginales	f_Ustilaginaceae	_
g96	0.0315457	k_Fungi	p_Basidiomycota	c_Ustilaginomycetes	o_Ustilaginales	f_Ustilaginaceae	g_Moesziomyces
g97	0.0378549	k_Fungi	p_Basidiomycota	c_Wallemiomycetes	o_Wallemiales	f_Wallemiaceae	g_Wallemia
g98	0.00946372	k_Fungi	p_Mortierellomycota	c_Mortierellomycetes	o_Mortierellales	f_Mortierellaceae	g_Mortierella
g99	0.0315457	k_Fungi	p_Mucoromycota	c_Mucoromycetes	o_Mucorales	f_Lichtheimiaceae	g_Lichtheimia
g100	0.0126183	k_Fungi	p_Mucoromycota	c_Mucoromycetes	o_Mucorales	f_Mucoraceae	_
g101	0.0347003	k_Fungi	p_Mucoromycota	c_Mucoromycetes	o_Mucorales	f_Mucoraceae	g_Mucor
g102	0.0662461	k_Fungi	p_Mucoromycota	c_Mucoromycetes	o_Mucorales	f_Rhizopodaceae	g_Rhizopus

## Sheet: Table S2
Table S2. Fungal phylum with different relative abundance between trial arms.
Fungi	Trial arms
	W1	HC	W2	LC	W1	LC	W2	HC	W1	LC	W2	HC
Fungi sp.	0.484244	0.355236	0.493145	0.307762	0.0785674	0.228365	0.447293	0.233254	0.300686	0.35359	0.440316	0.515847
Ascomycota	0.377538	0.41045	0.383406	0.270865	0.681769	0.618147	0.44893	0.518042	0.385781	0.451339	0.356783	0.3573
Basidiomycota	0.135588	0.234282	0.123333	0.421279	0.231715	0.153436	0.102724	0.247527	0.303583	0.195071	0.197757	0.124022
Mortierellomycota	0	0	0	0	0	4.02624e-05	0.000977154	0	0	0	0	0.000809148
Mucoromycota	0.00263034	3.18211e-05	0.000115741	9.46357e-05	0.00794905	1.09806e-05	7.63201e-05	0.00117691	0.00995036	0	0.00514487	0.00202156
Abbreviations: W1, the first washout; W2, the second washout.

## Sheet: Table S3
Table S3. Fungal genera with different relative abundance between trial arms.
Fungi	Trial arms
	W1	HC	W2	LC	W1	LC	W2	HC	W1	LC	W2	HC
Ascomycota spp.	0.000847284	0	0	0	0	0	0.00169908	0	0.000847284	0	0	8.00256e-05
Dothideomycetes	0	0.00453943	1.43277e-05	0	0	0	0	0	0	0	0	0
Botryosphaeriaceae sp.	0	6.70066e-05	0	0	0	0	0	0	0	0	0	0.000371596
Cladosporiaceae sp.	0.00363281	0.00486079	0.00261157	0.00511051	0.0045143	0.00164302	2.67664e-05	0.00311086	0.0112771	0.000252278	0.0121174	0.00277331
Cladosporium	0.014644	0.0732149	0.0514632	0.0215369	0.0388493	0.0479679	0.00479911	0.014855	0.0165383	0.0398618	0.0182051	0.0135948
Mycosphaerellaceae sp.	0	0	0.00146143	3.15021e-06	0	0	0	0	0	0	0	0
Teratosphaeriaceae sp.	0	0	0	0	0	0.00228162	0.0089015	0	0	0	0	0
Aureobasidiaceae sp.	0.000428324	0	0.000565298	0	0	0	0.00118868	0.00107338	0.0349962	0	0	0
Aureobasidium	0	0.00459947	0	0	0	0	0.00284203	0.000165426	0.00126978	0	0.00049098	0
Pleosporales spp.	0.00320163	0.00442927	0.00391214	0.00224019	0.00097561	0.000977836	0.000953284	0.00136143	0.00784756	0.000647599	5.76059e-05	0
Paraphaeosphaeria	0.0014354	0.0153233	0.00186877	0.0132856	0.00533518	0.00100602	0.00212104	0.0206564	0.000288913	0.000117647	0.00073708	0.00563192
Alternaria	0.0518113	0.0093967	0.00113255	0.00707714	0.00370969	0	0.00405234	0.00855714	0.0051896	0.00120298	0.0279677	0.00647664
Bipolaris	0.000137186	0.000115546	2.82934e-05	0	3.61133e-05	9.51656e-05	0	4.30453e-05	0	0	0	0.00010244
Curvularia	0.03454	0.000544396	0.000332562	0	0.00109995	0	0.0013885	0	2.43078e-05	0.000423529	0	0
Sporormiaceae sp.	0	0	0	0	0	0.00209511	0	0.000245808	2.11327e-05	0.00207232	0.000204821	0
Roussoella	0	0	0	0	0	0	0	0.000121714	0.00233997	0	0	0
Chaetothyriales spp.	0.00379431	0.0099872	0.000213291	0.000288552	0.0497874	0.00582286	0.00502072	0.00155842	0.0149323	0.00243627	0.00228873	0.0040326
Herpotrichiellaceae sp.	0	0.00011782	0	0	8.3512e-05	0	0	0	0	0	0	6.64964e-05
Cladophialophora	8.66829e-05	5.88112e-05	0.000257468	0	0.000175785	0.000154836	0.000264178	0.000338927	0.00300908	5.32163e-06	0.00106108	1.13556e-05
Exophiala	0.0145619	0	0	0	0	0	0	0	1.47489e-05	0.000508235	0	0
Eurotiales spp.	1.12329e-05	0	0.000559972	0	0	0.00519751	0.000631213	0.000122083	0.00486953	0	0.00019101	0.004349
Aspergillaceae sp.	0	6.50468e-05	0	0.000989405	0	0	0	0	0	0	1.56562e-05	0.00010425
Aspergillus	0.0596886	0.0215957	0.00624707	0.0297398	0.0609671	0.0278218	0.0229181	0.0231834	0.0920207	0.0382811	0.0590776	0.0786204
Monascus	0	3.45535e-05	0	0	0	0	0	0	0	0	0	0.000821107
Penicillium	0.0356681	0.0095789	0.0283083	0.0266964	0.0436538	0.00215167	0.00385994	0.00710975	0.0127031	0.00211844	0.00885242	0.00747407
Talaromyces	0.00185343	0	0.000993741	0.000162602	0.000118415	0	0	0	0.00185343	0	0	0
Gymnoascaceae sp.	0	9.6777e-05	0	0	0	0	0	0	0	0	0	0.0003676
Blumeria	0.000538551	0.000119722	0.000163377	0.00018556	0.00647979	1.46409e-05	0.000498968	1.50456e-05	0.000351924	2.66081e-05	0.00376996	0
Podosphaera	0.00144905	0	0	0	0	0	0	0	0.00144905	0	0	0
Sclerotiniaceae sp.	0.00186627	0	0	0.00593272	0	0	0	0	0.00186627	0	0	0.00457661
Pyronemataceae sp.	0	0	0	0	0	0	0	0.00761599	4.4196e-06	0	0	0
Saccharomycetales spp.	0.0102519	0.0140936	0.000549154	0.00412345	0.0254173	0.00445131	0.000361051	0.000169527	0.00295225	0.00320597	0.0294834	0.00806674
Debaryomyces	0	0.00620798	0	0	0.00667297	0.000370717	0.000930725	0.00074833	0.000544804	0	0.00527616	0.000357836
Meyerozyma	0.000362829	0	0	0	0	0.00577579	6.86921e-06	0	0	0	0.00158323	0
Clavispora	0.000452489	0	0	0	0	0	0.000106818	1.00304e-05	0	0.000182173	2.338e-05	0.000334991
Cyberlindnera	0	0	4.73774e-06	0	0.000298991	0	0	0	0	0	0	0
Wickerhamomyces	0	0.00244762	0	0	0	0.0133499	5.03278e-05	0	0	0	0	0
Pichia	0.00141374	0	0.000260266	0	0	0	3.09114e-05	0.00194745	0.00404893	0.00242613	0	0.000407437
Eremothecium	0	0	0	0	0	0	0.000435641	0	0	0	5.22496e-05	0
Kazachstania	0.00116176	0.000599791	0	0	0.00289857	0.000350048	0	0.0672737	0.0380978	0.0298051	1.89827e-05	0
Lachancea	0	0	0.000320068	0	0	0	0.000234379	0	0	0	0	0
Saccharomyces	0.0759169	0.0919769	0.187868	0.0900257	0.217581	0.245029	0.262282	0.269017	0.0231158	0.250756	0.100937	0.115353
Saccharomycetales fam Incertae sedis sp.	0	0	0	0	5.57491e-06	0.00393473	0	0	0	0	0	0
Candida	0.0459643	0.134115	0.0918342	0.0574358	0.186264	0.208711	0.104678	0.0646278	0.0922869	0.061377	0.076858	0.0897061
Starmerella	0	0	0	0	0.00240704	0	9.45144e-06	0	0	0	0	0
Hanseniaspora	0	0.00165774	4.83279e-05	0	0	0	0.00292373	2.87805e-05	0	0	0.00134118	0.00012329
Trichomonascaceae sp.	0	0	0	0	0	0	0	3.62161e-05	0.0006932	0	0	0
Sordariomycetes spp.	0	0	0.000264603	0	0.00842481	0	0.000342395	0	0.000412506	0	0	0
Hypocreales spp.	0.000922089	0.00035637	0.00014881	0.00145536	0.00449304	0.000397928	0	0.00646458	0.00237397	0	0.000105886	0.000168514
Trichoderma	0.000443942	0	0	0	0	0	7.64754e-06	0.000393639	0	0.000541929	0	0.00058242
Hypocreales fam Incertae sedis sp.	0.00229112	0	0	0	0.00273171	0.00935551	0	0	0	0.000121467	0	0
Nectriaceae sp.	0	0.000218191	0.0016979	0.00365154	0.00878819	0.0258964	0	0.00576887	0.00154379	0.00980175	0.00355209	0.000111067
Fusarium	0	0	0	0	0	0.00307692	0	0.0107962	0	0.00516671	0	0
Microascaceae sp.	0.00271034	0	0	0	0	0	0	0	0.00543437	0	0.00251375	0.000952817
Scopulariopsis	0.000106766	0	0	0.000387293	0	0	0	0	7.86305e-05	0	0	0
Chaetomiaceae sp.	0	0	0	0	0	0	0.00332984	0.000626665	0	0	0	0.000993836
Chaetomium	0.000106753	0	0	0	0	0	0.0015897	0	0	0	0	0
Podospora	0	0	0	0	0	0	0.00581917	0	0	0	0	0.0106879
Trichosphaeriaceae sp.	0	3.14821e-05	0.00027689	0.000537098	0	0.000217441	0	0	0	0	0	0
Nigrospora	0.000483016	0	0	0	0	0	0	0	0.000483016	0	0	0
Eutypella	0.00475382	0	0	0	0	0	0.00462585	0	0	0	0	0
Agrocybe	0	0	1.55372e-05	0	0	0	0	0	0	0.000230257	0	0
Lentinula	0	6.05969e-05	0	0.0342757	0.00562519	0.00344846	0.000206733	0	0	0	0.000986759	5.83631e-05
Flammulina	9.62822e-06	0.00205251	0	0.0020173	0.00141194	0.00722655	0.000134207	0	5.18164e-05	0.000336421	0	0.00169286
Pleurotus	0.00464475	0	0.000425212	0.00938793	0.0170383	0.0122149	6.30096e-06	0.10265	0.0123224	0.0401161	2.77637e-05	0.000416852
Auricularia	0.00245792	0.00656273	0.00337302	0.00529538	0	7.74809e-05	0	0.0029875	0.000108449	0	3.36087e-05	0.00813332
Cantharellales fam Incertae sedis sp.	0	0	0	0	0	3.19767e-06	0	0.00683893	0	0	0	0
Phanerochaete	0.000588926	0	0	0	0	0	0	9.92506e-05	0.00327712	0	0	0
Trametes	0	0	0.00120576	0.000162602	0	0	0	0	0	0	0	0
Agaricomycetes spp.	0.00276811	0.00215245	0.039952	0.0025224	0.0758618	0.0326616	0.0157032	0.0230698	0.0764937	0.00345486	0.086936	0.00279423
Cystobasidiomycetes spp.	0.000506039	5.62534e-06	0	0	0	0	0	0	0.000462155	0	0	0
Cystobasidium	0.00846679	1.53571e-05	0	0.0119356	0.000478501	0.00556832	1.91189e-05	0.0143038	1.54813e-05	0.00149696	0.00762998	0.00160398
Occultifur	0	0	0	0.000582764	0	0	0	0	0	0	0	0.0001733
Sakaguchia	0	0	0	0	0	0	0.00045637	0	0	0	0	0
Microstromatales fam Incertae sedis sp.	0	0	0	0	0	0	0	2.71621e-05	0.000748509	0	0	0
Tilletia	0	0	0	0	0	0	0	0	0.00146252	0	0	0.000809954
Malassezia	0.00736084	0.0195934	0.00596547	0.00328721	0.0640955	0.00659748	0.00584754	0.00997825	0.0519178	0.000407444	0.0140715	0.0075213
Microbotryomycetes spp.	0	0	0	0	0	0	0.000937233	0	0	0	0	0
Rhodotorula	0	0	0.0083479	0.00384841	0.0018201	0.00532349	0.0423026	0.0059	2.88913e-05	0.00961647	0.00572316	0.00894939
Sporobolomyces	0.000454131	0	9.92064e-05	8.66237e-05	0.00410386	0	0	0	0.000454131	0	1.28957e-05	0
Cystofilobasidiales spp.	0	0	0	0	0.000409889	0	0	0	0	0.00262919	0	0.000210425
Cystofilobasidium	0	0	0	0	0	0	0	0	2.16685e-05	5.71651e-05	0	0
Mrakiaceae sp.	0.001998	2.76428e-05	0	0.00089066	0	0	0	0.000159723	0.0202581	0	0	0
Filobasidium	0	0.00163103	0.000775086	0	2.63483e-05	0	9.26919e-05	0.00127263	0.00265157	6.54053e-05	0.00294224	0.0068397
Naganishia	0	0	0	0	0	0	0	0	0.00107732	0	0	0.00080725
Tremellales spp.	0.00040426	0.00089955	0.000961433	0.00010605	0	0	0.00141469	0.00493498	0.000766448	0.000518079	0.00128992	0.0128295
Dioszegia	0	0	0.00666809	0	0	0	0	0.000749655	0	0	0	0
Hannaella	0	0	0	0	0	0	0	0	2.16685e-05	0.000168897	0	0
Papiliotrema	0	0	8.79353e-05	3.42096e-06	0	0	0	0	0	0	0	0
Trichosporonaceae sp.	0.0185146	0.0153991	0.00280494	0.0121061	0.00180738	0.0380154	0.00120467	0.0257587	0.00807451	0.0186901	0.0187348	0.000465053
Apiotrichum	0.000692478	3.89579e-06	0	0	0	0	0	0	0	0	0	0
Cutaneotrichosporon	0.0800784	0.0470285	0.0313054	0.0529995	0.0577492	0.0419821	0.0321535	0.0476046	0.122707	0.115186	0.0591853	0.0523553
Trichosporon	0.00592162	0.00469325	0.020866	0.00384979	0	4.64886e-05	0.000177086	0	0.000403131	0.000682353	0.000125012	0.00359155
Ustilaginaceae sp.	0	0.134156	0.000101414	0.277921	0	0.000270856	0.000720467	0.000193791	0	0.00110092	5.76059e-05	0.0127523
Moesziomyces	0.000462695	0	0.000378542	0	0.00114208	0	0	0.000366018	0	0.000223062	0	2.30381e-05
Wallemia	0.000258357	0	0	0	0.000144453	0	0.00134722	0.000632591	0.000258357	9.21128e-05	0	0.00199436
Mortierella	0	0	0	0	0	4.02624e-05	0.000977154	0	0	0	0	0.000809148
Lichtheimia	0.000751001	0	0	0	0	0	0	2.71621e-05	0.00253114	0	0	0
Mucoraceae sp.	0	0	0	0	0.00419667	0	0	0	0	0	0	0
Mucor	0	3.18211e-05	3.30688e-05	9.46357e-05	0.00129432	1.09806e-05	0	5.43242e-05	0.00206485	0	0	1.53587e-05
Rhizopus	0.00187934	0	8.2672e-05	0	0.00245806	0	7.63201e-05	0.00109542	0.00535437	0	0.00514487	0.0020062
Abbreviations: W1, the first washout; W2, the second washout.

## Sheet: Table S4
Table S4. Prevalence of core gut mycobiome detected at all sampling points.
Label	Prevalence	Kindom	Phylum	Class	Order	Family	Genus
g5	0.114286	k_Fungi	p_Ascomycota	c_Dothideomycetes	o_Capnodiales	f_Cladosporiaceae	_
g6	0.314286	k_Fungi	p_Ascomycota	c_Dothideomycetes	o_Capnodiales	f_Cladosporiaceae	g_Cladosporium
g11	0.0793651	k_Fungi	p_Ascomycota	c_Dothideomycetes	o_Pleosporales	_	_
g12	0.11746	k_Fungi	p_Ascomycota	c_Dothideomycetes	o_Pleosporales	f_Didymosphaeriaceae	g_Paraphaeosphaeria
g13	0.15873	k_Fungi	p_Ascomycota	c_Dothideomycetes	o_Pleosporales	f_Pleosporaceae	g_Alternaria
g18	0.136508	k_Fungi	p_Ascomycota	c_Eurotiomycetes	o_Chaetothyriales	_	_
g20	0.0761905	k_Fungi	p_Ascomycota	c_Eurotiomycetes	o_Chaetothyriales	f_Herpotrichiellaceae	g_Cladophialophora
g24	0.52381	k_Fungi	p_Ascomycota	c_Eurotiomycetes	o_Eurotiales	f_Aspergillaceae	g_Aspergillus
g26	0.346032	k_Fungi	p_Ascomycota	c_Eurotiomycetes	o_Eurotiales	f_Aspergillaceae	g_Penicillium
g29	0.126984	k_Fungi	p_Ascomycota	c_Leotiomycetes	o_Erysiphales	f_Erysiphaceae	g_Blumeria
g33	0.171429	k_Fungi	p_Ascomycota	c_Saccharomycetes	o_Saccharomycetales	_	_
g34	0.0603175	k_Fungi	p_Ascomycota	c_Saccharomycetes	o_Saccharomycetales	f_Debaryomycetaceae	g_Debaryomyces
g41	0.139683	k_Fungi	p_Ascomycota	c_Saccharomycetes	o_Saccharomycetales	f_Saccharomycetaceae	g_Kazachstania
g43	0.571429	k_Fungi	p_Ascomycota	c_Saccharomycetes	o_Saccharomycetales	f_Saccharomycetaceae	g_Saccharomyces
g45	0.533333	k_Fungi	p_Ascomycota	c_Saccharomycetes	o_Saccharomycetales	f_Saccharomycetales_fam_Incertae_sedis	g_Candida
g50	0.0634921	k_Fungi	p_Ascomycota	c_Sordariomycetes	o_Hypocreales	_	_
g53	0.0571429	k_Fungi	p_Ascomycota	c_Sordariomycetes	o_Hypocreales	f_Nectriaceae	_
g64	0.0507937	k_Fungi	p_Basidiomycota	c_Agaricomycetes	o_Agaricales	f_Omphalotaceae	g_Lentinula
g65	0.0920635	k_Fungi	p_Basidiomycota	c_Agaricomycetes	o_Agaricales	f_Physalacriaceae	g_Flammulina
g66	0.133333	k_Fungi	p_Basidiomycota	c_Agaricomycetes	o_Agaricales	f_Pleurotaceae	g_Pleurotus
g67	0.0857143	k_Fungi	p_Basidiomycota	c_Agaricomycetes	o_Auriculariales	f_Auriculariaceae	g_Auricularia
g71	0.301587	k_Fungi	p_Basidiomycota	c_Agaricomycetes	o_unidentified	f_unidentified	g_unidentified
g73	0.0539683	k_Fungi	p_Basidiomycota	c_Cystobasidiomycetes	o_Cystobasidiales	f_Cystobasidiaceae	g_Cystobasidium
g78	0.374603	k_Fungi	p_Basidiomycota	c_Malasseziomycetes	o_Malasseziales	f_Malasseziaceae	g_Malassezia
g80	0.107937	k_Fungi	p_Basidiomycota	c_Microbotryomycetes	o_Sporidiobolales	f_Sporidiobolaceae	g_Rhodotorula
g87	0.0698413	k_Fungi	p_Basidiomycota	c_Tremellomycetes	o_Tremellales	_	_
g91	0.206349	k_Fungi	p_Basidiomycota	c_Tremellomycetes	o_Trichosporonales	f_Trichosporonaceae	_
g93	0.593651	k_Fungi	p_Basidiomycota	c_Tremellomycetes	o_Trichosporonales	f_Trichosporonaceae	g_Cutaneotrichosporon
g94	0.0825397	k_Fungi	p_Basidiomycota	c_Tremellomycetes	o_Trichosporonales	f_Trichosporonaceae	g_Trichosporon
g95	0.139683	k_Fungi	p_Basidiomycota	c_Ustilaginomycetes	o_Ustilaginales	f_Ustilaginaceae	_
g102	0.0666667	k_Fungi	p_Mucoromycota	c_Mucoromycetes	o_Mucorales	f_Rhizopodaceae	g_Rhizopus

## Sheet: Table S5
Table S5. PERMANOVA analysis results based on Bray-Curtis dissimilarity.
Group	Sums of squares	Variation (R2)	F.Model	p*	FDR
Before/After HC	0.59204	0.0378147	2.10325	0.023	0.0345
Before/After LC	1.13259	0.0723998	4.25054	0.001	0.006

## Sheet: Table S6
Table S6. Short-term variation of the human gut mycobiome induced by the HC diet.
Label	Alteration	p*	FDR	Phylum	Class	Family	Genus
g66	Increased	0.000584659	0.0181244	p_Basidiomycota	c_Agaricomycetes	f_Pleurotaceae	g_Pleurotus
g95	Increased	0.00196553	0.0304657	p_Basidiomycota	c_Ustilaginomycetes	f_Ustilaginaceae	_
g29	Decreased	0.00603985	0.0519179	p_Ascomycota	c_Leotiomycetes	f_Erysiphaceae	g_Blumeria
g67	Increased	0.00826562	0.0519179	p_Basidiomycota	c_Agaricomycetes	f_Auriculariaceae	g_Auricularia
g41	Increased	0.00837385	0.0519179	p_Ascomycota	c_Saccharomycetes	f_Saccharomycetaceae	g_Kazachstania
g12	Increased	0.0213894	0.110512	p_Ascomycota	c_Dothideomycetes	f_Didymosphaeriaceae	g_Paraphaeosphaeria
g71	Decreased	0.0274482	0.121556	p_Basidiomycota	c_Agaricomycetes	f_unidentified	g_unidentified
g65	Increased	0.044011	0.170543	p_Basidiomycota	c_Agaricomycetes	f_Physalacriaceae	g_Flammulina
g6	Increased	0.0633714	0.218279	p_Ascomycota	c_Dothideomycetes	f_Cladosporiaceae	g_Cladosporium
g13	Decreased	0.0885447	0.274489	p_Ascomycota	c_Dothideomycetes	f_Pleosporaceae	g_Alternaria
g87	Increased	0.168167	0.473925	p_Basidiomycota	c_Tremellomycetes	_	_
g102	Decreased	0.263494	0.680693	p_Mucoromycota	c_Mucoromycetes	f_Rhizopodaceae	g_Rhizopus
g53	Increased	0.294507	0.702287	p_Ascomycota	c_Sordariomycetes	f_Nectriaceae	_
g26	Decreased	0.350163	0.775361	p_Ascomycota	c_Eurotiomycetes	f_Aspergillaceae	g_Penicillium
g18	Increased	0.414446	0.854842	p_Ascomycota	c_Eurotiomycetes	_	_
g50	Increased	0.441209	0.854842	p_Ascomycota	c_Sordariomycetes	_	_
g11	Increased	0.50488	0.876289	p_Ascomycota	c_Dothideomycetes	_	_
g78	Increased	0.508813	0.876289	p_Basidiomycota	c_Malasseziomycetes	f_Malasseziaceae	g_Malassezia
g64	Decreased	0.583882	0.926779	p_Basidiomycota	c_Agaricomycetes	f_Omphalotaceae	g_Lentinula
g43	Increased	0.597922	0.926779	p_Ascomycota	c_Saccharomycetes	f_Saccharomycetaceae	g_Saccharomyces
g80	Decreased	0.666137	0.945052	p_Basidiomycota	c_Microbotryomycetes	f_Sporidiobolaceae	g_Rhodotorula
g91	Increased	0.702238	0.945052	p_Basidiomycota	c_Tremellomycetes	f_Trichosporonaceae	_
g94	Increased	0.755658	0.945052	p_Basidiomycota	c_Tremellomycetes	f_Trichosporonaceae	g_Trichosporon
g34	Increased	0.759766	0.945052	p_Ascomycota	c_Saccharomycetes	f_Debaryomycetaceae	g_Debaryomyces
g45	Increased	0.762139	0.945052	p_Ascomycota	c_Saccharomycetes	f_Saccharomycetales_fam_Incertae_sedis	g_Candida
g5	Decreased	0.888841	0.976065	p_Ascomycota	c_Dothideomycetes	f_Cladosporiaceae	_
g20	Decreased	0.893904	0.976065	p_Ascomycota	c_Eurotiomycetes	f_Herpotrichiellaceae	g_Cladophialophora
g73	Decreased	0.905695	0.976065	p_Basidiomycota	c_Cystobasidiomycetes	f_Cystobasidiaceae	g_Cystobasidium
g24	Decreased	0.937481	0.976065	p_Ascomycota	c_Eurotiomycetes	f_Aspergillaceae	g_Aspergillus
g33	Decreased	0.944579	0.976065	p_Ascomycota	c_Saccharomycetes	_	_
g93	Decreased	1	1	p_Basidiomycota	c_Tremellomycetes	f_Trichosporonaceae	g_Cutaneotrichosporon
*p was calculated by the paired Wilcoxon signed-rank test (N = 28).

## Sheet: Table S7
Table S7. Short-term variation of the human gut mycobiome induced by the LC diet.
Label	Alteration	p*	FDR	Phylum	Class	Family	Genus
g95	Increased	0.000111577	0.00345887	p_Basidiomycota	c_Ustilaginomycetes	f_Ustilaginaceae	_
g78	Decreased	0.00051854	0.00668344	p_Basidiomycota	c_Malasseziomycetes	f_Malasseziaceae	g_Malassezia
g71	Decreased	0.000646785	0.00668344	p_Basidiomycota	c_Agaricomycetes	f_unidentified	g_unidentified
g29	Decreased	0.00975977	0.0756382	p_Ascomycota	c_Leotiomycetes	f_Erysiphaceae	g_Blumeria
g102	Decreased	0.0142662	0.0880709	p_Mucoromycota	c_Mucoromycetes	f_Rhizopodaceae	g_Rhizopus
g26	Decreased	0.017046	0.0880709	p_Ascomycota	c_Eurotiomycetes	f_Aspergillaceae	g_Penicillium
g91	Increased	0.0733291	0.263479	p_Basidiomycota	c_Tremellomycetes	f_Trichosporonaceae	_
g94	Decreased	0.0806128	0.263479	p_Basidiomycota	c_Tremellomycetes	f_Trichosporonaceae	g_Trichosporon
g24	Decreased	0.0856554	0.263479	p_Ascomycota	c_Eurotiomycetes	f_Aspergillaceae	g_Aspergillus
g65	Increased	0.0916805	0.263479	p_Basidiomycota	c_Agaricomycetes	f_Physalacriaceae	g_Flammulina
g5	Decreased	0.0934925	0.263479	p_Ascomycota	c_Dothideomycetes	f_Cladosporiaceae	_
g87	Decreased	0.108319	0.271702	p_Basidiomycota	c_Tremellomycetes	_	_
g11	Decreased	0.12609	0.271702	p_Ascomycota	c_Dothideomycetes	_	_
g18	Decreased	0.12609	0.271702	p_Ascomycota	c_Eurotiomycetes	_	_
g43	Increased	0.131469	0.271702	p_Ascomycota	c_Saccharomycetes	f_Saccharomycetaceae	g_Saccharomyces
g34	Decreased	0.142213	0.275538	p_Ascomycota	c_Saccharomycetes	f_Debaryomycetaceae	g_Debaryomyces
g73	Increased	0.204894	0.366012	p_Basidiomycota	c_Cystobasidiomycetes	f_Cystobasidiaceae	g_Cystobasidium
g64	Increased	0.230024	0.366012	p_Basidiomycota	c_Agaricomycetes	f_Omphalotaceae	g_Lentinula
g67	Decreased	0.233953	0.366012	p_Basidiomycota	c_Agaricomycetes	f_Auriculariaceae	g_Auricularia
g20	Decreased	0.236137	0.366012	p_Ascomycota	c_Eurotiomycetes	f_Herpotrichiellaceae	g_Cladophialophora
g41	Decreased	0.297074	0.434089	p_Ascomycota	c_Saccharomycetes	f_Saccharomycetaceae	g_Kazachstania
g50	Decreased	0.308063	0.434089	p_Ascomycota	c_Sordariomycetes	_	_
g33	Decreased	0.420965	0.567388	p_Ascomycota	c_Saccharomycetes	_	_
g13	Increased	0.475533	0.61423	p_Ascomycota	c_Dothideomycetes	f_Pleosporaceae	g_Alternaria
g45	Decreased	0.524345	0.641812	p_Ascomycota	c_Saccharomycetes	f_Saccharomycetales_fam_Incertae_sedis	g_Candida
g66	Increased	0.538294	0.641812	p_Basidiomycota	c_Agaricomycetes	f_Pleurotaceae	g_Pleurotus
g6	Decreased	0.602113	0.675688	p_Ascomycota	c_Dothideomycetes	f_Cladosporiaceae	g_Cladosporium
g12	Increased	0.610299	0.675688	p_Ascomycota	c_Dothideomycetes	f_Didymosphaeriaceae	g_Paraphaeosphaeria
g80	Increased	0.711997	0.7611	p_Basidiomycota	c_Microbotryomycetes	f_Sporidiobolaceae	g_Rhodotorula
g93	Decreased	0.779298	0.805275	p_Basidiomycota	c_Tremellomycetes	f_Trichosporonaceae	g_Cutaneotrichosporon
g53	Increased	0.905695	0.905695	p_Ascomycota	c_Sordariomycetes	f_Nectriaceae	_
*p was calculated by the paired Wilcoxon signed-rank test (N = 28).

## Sheet: Table S8
Table S8. Associations between the mean fungal relative abundance and the mean values of glycemic responses in the HC diet (N = 28).
Fungi	CGM features	beta	lul	uul	p
Ustilaginaceae sp.	AUC24	0.454312	0.27449	0.634135	7.1e-06
Ustilaginaceae sp.	MPG	0.225495	0.0483164	0.402673	0.0157734
Ustilaginaceae sp.	HPT	0.272165	0.0553252	0.489006	0.0167853
Pleurotus	MAGE	-0.204372	-0.370747	-0.0379982	0.0195157
Kazachstania	MAGE	-0.197098	-0.366411	-0.0277842	0.0266851
Ustilaginaceae sp.	MAGE	0.157303	-0.0183553	0.332962	0.0851377
Pleurotus	MPG	-0.151139	-0.325234	0.0229561	0.0944741
Pleurotus	HPT	-0.171199	-0.383545	0.0411472	0.119124
Pleurotus	AUC24	-0.148421	-0.348579	0.051737	0.151311
Kazachstania	morning MBG	0.0896196	-0.0540363	0.233275	0.227175
Kazachstania	AUC24	-0.123679	-0.328792	0.0814336	0.242172
Agaricomycetes spp.	MAGE	-0.109469	-0.293377	0.0744384	0.248035
Ustilaginaceae sp.	morning MBG	0.0869019	-0.0610386	0.234842	0.255067
Auricularia	morning MBG	-0.0721339	-0.214714	0.0704466	0.32608
Kazachstania	HPT	-0.0976638	-0.318353	0.123026	0.389156
Auricularia	MAGE	-0.0732458	-0.244987	0.0984958	0.406938
Auricularia	MPG	-0.0689866	-0.245289	0.107316	0.44643
Agaricomycetes spp.	MPG	-0.0727268	-0.260947	0.115494	0.451796
Agaricomycetes spp.	AUC24	-0.076963	-0.287789	0.133863	0.476853
Blumeria	MAGE	0.055924	-0.117118	0.228966	0.52922
Auricularia	AUC24	-0.0634182	-0.26521	0.138374	0.540268
Blumeria	morning MBG	-0.0294324	-0.174407	0.115542	0.692369
Agaricomycetes spp.	HPT	-0.0415445	-0.266345	0.183256	0.718335
Paraphaeosphaeria	morning MBG	-0.0252558	-0.166028	0.115516	0.726599
Auricularia	HPT	-0.0349775	-0.250807	0.180852	0.751825
Paraphaeosphaeria	AUC24	0.0305426	-0.17049	0.231575	0.766961
Agaricomycetes spp.	morning MBG	0.0229275	-0.13276	0.178615	0.77394
Paraphaeosphaeria	MPG	0.0207982	-0.154096	0.195693	0.816612
Kazachstania	MPG	-0.0193118	-0.199372	0.160748	0.834318
Blumeria	HPT	-0.013446	-0.231657	0.204765	0.904257
Pleurotus	morning MBG	0.00877119	-0.136959	0.154502	0.90655
Paraphaeosphaeria	HPT	0.0108722	-0.20408	0.225825	0.92136
Blumeria	AUC24	-0.00516542	-0.209607	0.199276	0.96067
Blumeria	MPG	0.00390417	-0.17484	0.182648	0.966012
Paraphaeosphaeria	MAGE	0.00288134	-0.167441	0.173204	0.973678
Linear mixed models were performed, adjusted for age, gender and BMI. Abbreviations: MPG, maximum postprandial glucose; AUC24, the total area under the curve from 00:00 to 24:00 of the day; morning MBG,morning mean blood glucose; PTH, percentage of time spent in a hyperglycaemic range; MAGE, mean amplitude of glucose excursions.

## Sheet: Table S9
Table S9. Associations between the mean fungal relative abundance and the mean values of glycemic responses in the LC diet (N = 28).
Fungi	CGM features	beta	lul	uul	p
Ustilaginaceae sp.	PMG	-0.241154	-0.418161	-0.064148	0.00998433
Ustilaginaceae sp.	AUC24	-0.250355	-0.440219	-0.0604917	0.0123883
Agaricomycetes spp.	MAGE	0.174689	0.0272835	0.322095	0.0238672
Agaricomycetes spp.	AUC24	0.209297	0.0177701	0.400824	0.0360109
Malassezia	morning MBG	0.174566	0.0148829	0.334249	0.0365147
Blumeria	HPT	0.222978	0.0144124	0.431544	0.0399926
Malassezia	MPG	0.191979	0.00992239	0.374035	0.0430264
Blumeria	MPG	0.173328	-0.0133851	0.360041	0.0738441
Agaricomycetes spp.	MPG	0.160095	-0.0253617	0.345553	0.0956868
Penicillium	MPG	-0.157099	-0.343305	0.0291076	0.103242
Agaricomycetes spp.	HPT	0.163737	-0.0448931	0.372367	0.128584
Rhizopus	morning MBG	0.113102	-0.0511501	0.277354	0.182569
Blumeria	MAGE	0.102122	-0.0502402	0.254485	0.194435
Penicillium	morning MBG	-0.109353	-0.274859	0.0561534	0.20057
Ustilaginaceae sp.	morning MBG	-0.0971239	-0.259275	0.0650273	0.245682
Malassezia	AUC24	0.0920083	-0.104534	0.288551	0.362296
Rhizopus	HPT	0.0896946	-0.122035	0.301424	0.409232
Ustilaginaceae sp.	MAGE	-0.0623939	-0.211443	0.0866554	0.415709
Blumeria	AUC24	0.0807903	-0.120107	0.281687	0.433523
Rhizopus	AUC24	0.0780193	-0.120027	0.276066	0.442863
Ustilaginaceae sp.	HPT	-0.0849119	-0.302417	0.132593	0.447193
Rhizopus	MPG	0.0714312	-0.117227	0.26009	0.460862
Rhizopus	MAGE	0.0568011	-0.0961164	0.209719	0.469646
Agaricomycetes spp.	morning MBG	0.0427199	-0.124203	0.209643	0.617867
Penicillium	HPT	-0.0521333	-0.264846	0.16058	0.632442
Penicillium	MAGE	-0.0298884	-0.184449	0.124673	0.706098
Malassezia	MAGE	0.0245318	-0.128338	0.177401	0.754293
Penicillium	AUC24	-0.0292667	-0.229146	0.170612	0.775014
Malassezia	HPT	-0.0303267	-0.242574	0.18192	0.78027
Blumeria	morning MBG	-0.0081189	-0.177905	0.161667	0.925662
Linear mixed models were performed, adjusted for age, gender and BMI. Abbreviations: MPG, maximum postprandial glucose; AUC24, the total area under the curve from 00:00 to 24:00 of the day; morning MBG,morning mean blood glucose; PTH, percentage of time spent in a hyperglycaemic range; MAGE, mean amplitude of glucose excursions.
